# Supplementary material
Source: MDPI journal article supplement (https://www.mdpi.com/2071-1050/13/21/11651)
Supplement: s1 [file s1]

**Table S1.** Index of inclusive green growth

| Dimension                        | Secondary index          |                                                                                           | Unit           | symbol |
|----------------------------------|--------------------------|-------------------------------------------------------------------------------------------|----------------|--------|
| Economy                          | Output                   | Per capita GDP                                                                            | Yuan           | +      |
|                                  |                          | Proportion of fiscal revenue                                                              | %              | +      |
|                                  |                          | Proportion of added value of the secondary industry in GDP                                | %              | -      |
|                                  |                          | Proportion of added value of service sector in GDP                                        | %              | +      |
|                                  | Income                   | Average income of government officials or state-owned enterprise employee                 | Yuan           | +      |
| Social equality                  | Employment               | Employment rate in secondary and service sector                                           | %              | +      |
|                                  |                          | Unemployment in cities                                                                    | /              | -      |
|                                  | Education                | Number of primary schools for every ten thousand people                                   | /              | +      |
|                                  |                          | Number of middle schools for every ten thousand people                                    | /              | +      |
|                                  | Medical treatment        | Number of doctors                                                                         | /              | +      |
|                                  |                          | Number of hospitals, medical centers and clinics                                          | /              | +      |
|                                  | Insurance                | Number of government officials or state-owned enterprise employee covered by pension fund | /              | +      |
|                                  |                          | Number of citizens covered by medical insurance                                           | /              | +      |
|                                  | Public service           | Buses per 1000 citizens                                                                   | /              | +      |
|                                  |                          | Expenditure of urban maintenance and construction funds                                   | 10000 Yuan     | +      |
|                                  |                          | Drain length                                                                              | kilometer      | +      |
|                                  |                          | Road area per capita                                                                      | m <sup>2</sup> | +      |
| Green production and consumption | Green production         | Industrial waste water                                                                    | 10000 ton      | -      |
|                                  |                          | Industrial SO <sub>2</sub>                                                                | ton            | -      |
|                                  | Green consumption        | Household electricity consumption in cities                                               | 10000 KWh      | -      |
|                                  |                          | Water use per capita                                                                      | litre          | -      |
| Environment                      | Living condition         | Park area per capita                                                                      | m <sup>2</sup> | +      |
|                                  |                          | Greenery coverage of urban area                                                           | %              | +      |
|                                  | Environmental management | comprehensively utilized industrial solid wastes                                          | %              | +      |
|                                  |                          | sewage disposal                                                                           | %              | +      |

|  |  |                                           |   |   |
|--|--|-------------------------------------------|---|---|
|  |  | innocuous disposal of domestic<br>garbage | % | + |
|--|--|-------------------------------------------|---|---|
